# Supplementary material
Source: Springer Nature journal article supplement (https://www.springermedizin.de/resource/supplementary/12885_2007_959_MOESM7_ESM.pdf/9471234)

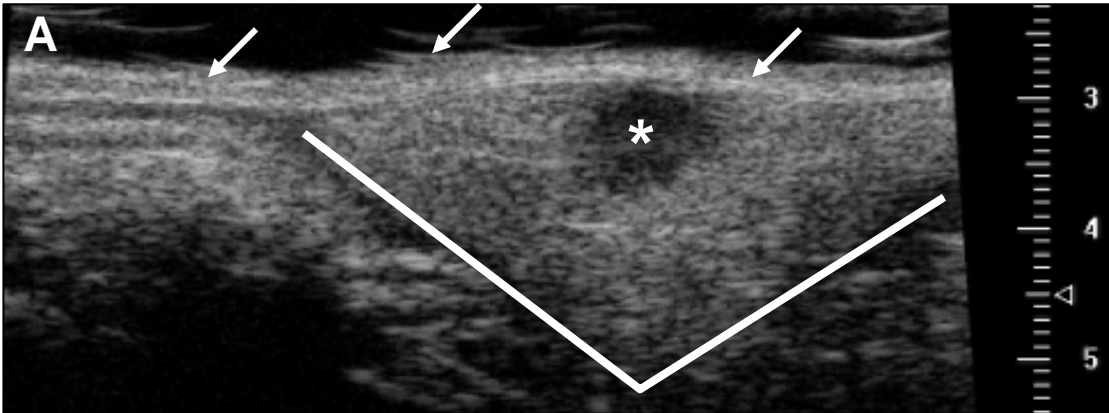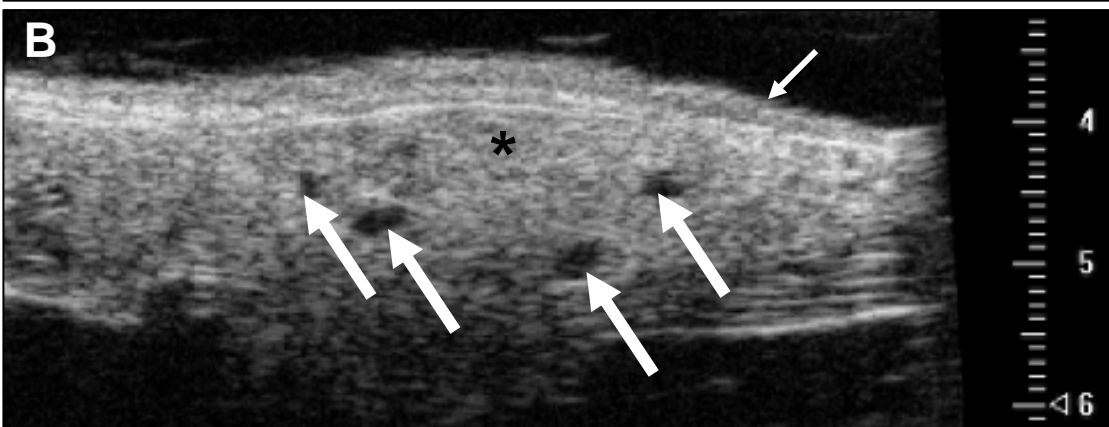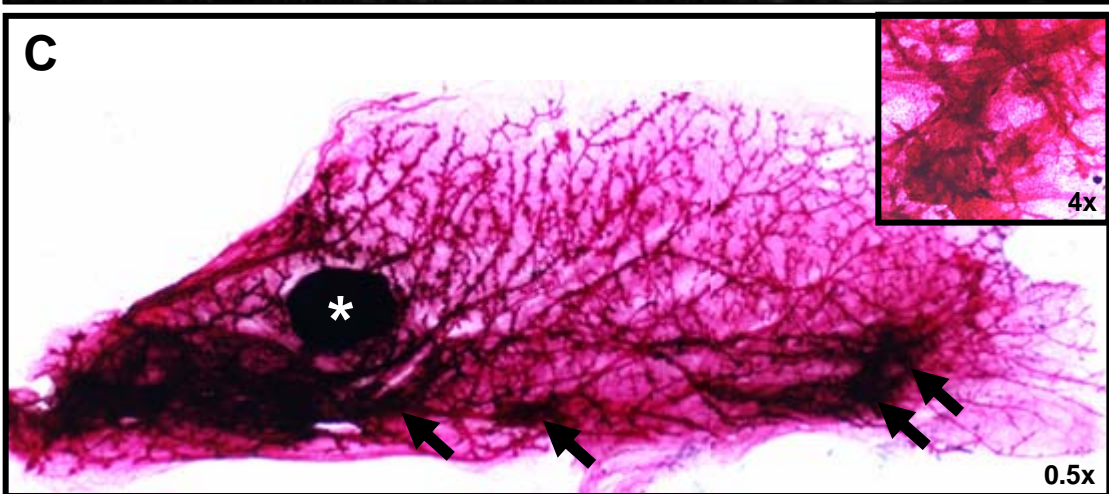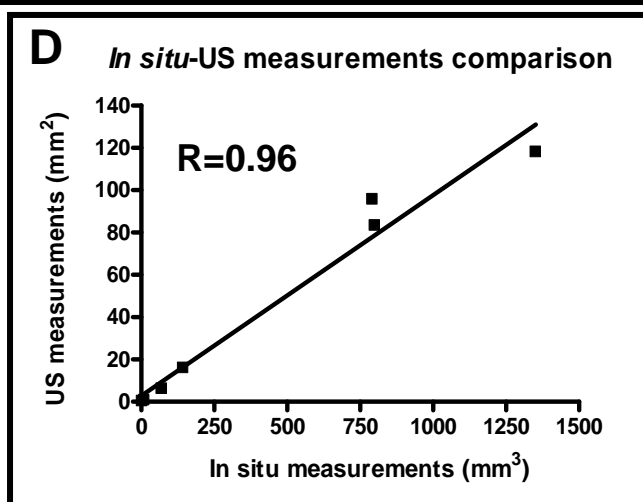

Supplement: MOESM7 [file 9471234]
